# Supplementary material for: Clostridium perfringens chitinases, key enzymes during early stages of necrotic enteritis in broiler chickens
Source: PubMed Central journal article supplement (PMC11426533; doi:10.1371/journal.ppat.1012560), 2024-09-16
Supplement: ppat.1012560.s001.pdf [file ppat.1012560.s001.pdf]

**S1 Table: Subcellular localization and secretion pathway prediction of ChiA or ChiB**

|                                       | ChiA        |             | ChiB        |             |
|---------------------------------------|-------------|-------------|-------------|-------------|
| <b>Cello predictions</b>              | Score       | Probability | Score       | Probability |
| Extracellular                         | 4.875       | 97.5%       | 3.840       | 76.8%       |
| Cell wall                             | 0.024       | 0.5%        | 0.224       | 4.5%        |
| Membrane                              | 0.029       | 0.6%        | 0.586       | 11.7%       |
| Cytoplasmic                           | 0.072       | 1.4%        | 0.350       | 7.0%        |
| <b>SecretomeP predictions</b>         | Score       |             | Score       |             |
| SecP score                            | 0.892       |             | 0.897       |             |
| <b>SignalP predictions</b>            | Probability |             | Probability |             |
| Signal peptide (Sec/SPI)              | 91.1%       |             | 10.4%       |             |
| TAT Signal peptide (Tat/SPI)          | 0.8%        |             | 0.2%        |             |
| Lipoprotein signal peptide (Sec/SPII) | 5.0%        |             | 0.8%        |             |
| Other                                 | 3.2%        |             | 88.6%       |             |
