# Supplementary material for: Clostridium perfringens chitinases, key enzymes during early stages of necrotic enteritis in broiler chickens
Source: PubMed Central journal article supplement (PMC11426533; doi:10.1371/journal.ppat.1012560), 2024-09-16
Supplement: ppat.1012560.s002.pdf [file ppat.1012560.s002.pdf]

**S2 Table: Physicochemical parameters of *C. perfringens* chitinases ChiA and ChiB computed using the ExpASy ProtParam tool**

|             | <b>Number<br/>of amino acids</b> | <b>of MW (kDa)</b> | <b>pl</b> | <b>Instability<br/>index</b> | <b>Aliphatic<br/>index</b> | <b>GRAVY</b> |
|-------------|----------------------------------|--------------------|-----------|------------------------------|----------------------------|--------------|
| <b>ChiA</b> | 577                              | 65.35              | 5.16      | 28.98                        | 74.14                      | -0.528       |
| <b>ChiB</b> | 599                              | 65.91              | 4.84      | 27.86                        | 72.79                      | -0.508       |
