# Supplementary material for: Clostridium perfringens chitinases, key enzymes during early stages of necrotic enteritis in broiler chickens
Source: PubMed Central journal article supplement (PMC11426533; doi:10.1371/journal.ppat.1012560), 2024-09-16
Supplement: ppat.1012560.s003.pdf [file ppat.1012560.s003.pdf]

**S3 Table: Dataset and refinement statistics of X-ray crystallography**

|                              | ChiA                                          |                                                           |                                                          |                                                           | ChiB                                                                    |                                                                                                                                                         |
|------------------------------|-----------------------------------------------|-----------------------------------------------------------|----------------------------------------------------------|-----------------------------------------------------------|-------------------------------------------------------------------------|---------------------------------------------------------------------------------------------------------------------------------------------------------|
| Name                         | Apo                                           | Chitin hexamer                                            | Bisdionin C                                              | Chitosan hexamer                                          | Apo                                                                     | BisdioninC                                                                                                                                              |
| Construct                    | S46-K611                                      | S45-K611 E196Q                                            | S46-K611                                                 | S46-K611                                                  | M1-S599                                                                 | M1-S599                                                                                                                                                 |
| PDB code                     | 8otb                                          | 8oye                                                      | 8ose                                                     | 8owf                                                      | 8ovr                                                                    | 8c6z                                                                                                                                                    |
| <b>Dataset Statistics</b>    |                                               |                                                           |                                                          |                                                           |                                                                         |                                                                                                                                                         |
| Collection source            | EMBL P14                                      | EMBL P14                                                  | EMBL P14                                                 | EMBL P14                                                  | Soleil PX2                                                              | EMBL P14                                                                                                                                                |
| Crystallization condition    | 0.2M NaBr, 20% (w/v) PEG 3350                 | 0.2M NaF, 20% (w/v) PEG 3350, 1mM (b-GlcNAc) <sub>6</sub> | 0.2M lithium acetate, 20% (w/v) PEG 3350, 1mM BisdioninC | 0.2 M LiCl, 20% (w/v) PEG 3350, 1mM (b-GlcN) <sub>6</sub> | 0.1 M MgFormate<br>0.1 M RbCl<br>0.1 M PIPES pH 7<br>25% PEG Smear High | 5mM CoCl <sub>2</sub><br>NiCl <sub>2</sub><br>CdCl <sub>2</sub><br>MgCl <sub>2</sub><br>(each),100mM<br>HEPES pH7.5, 12%<br>PEG 3350, 1mM<br>BisdioninC |
| cryoprotection               | 15% EtGlyc                                    | 17% ZW2:2:1                                               | 17% ZW2:2:1                                              | 18% ZW2:2:1                                               | 15% PEG400                                                              | 20% EtGlyc                                                                                                                                              |
| Wavelength (Å)               | 1.033                                         | 0.976                                                     | 1.033                                                    | 0.976                                                     | 0.980                                                                   | 0.976                                                                                                                                                   |
| Spacegroup                   | P2 <sub>1</sub> 2 <sub>1</sub> 2 <sub>1</sub> | P2 <sub>1</sub> 2 <sub>1</sub> 2 <sub>1</sub>             | P2 <sub>1</sub> 2 <sub>1</sub> 2 <sub>1</sub>            | P2 <sub>1</sub> 2 <sub>1</sub> 2 <sub>1</sub>             | C2                                                                      | P4 <sub>1</sub> 2 <sub>1</sub> 2                                                                                                                        |
| Unit cell (Å)                | 50.47 109.03 111.58                           | 50.486 111.599 108.916                                    | 50.329 108.802 111.08                                    | 50.436 108.498 111.407                                    | 192.876 59.803 68.707                                                   | 67.401 67.401 355.823                                                                                                                                   |
| (°)                          | 90 90 90                                      | 90 90 90                                                  | 90 90 90                                                 | 90 90 90                                                  | 90 108.176 90                                                           | 90 90 90                                                                                                                                                |
| Resolution (Å)               | 37.43 - 1.50 (1.54 - 1.50)                    | 77.95 - 1.35 (1.43 - 1.35)                                | 49.47 - 1.35 (1.39 - 1.35)                               | 45.74 - 1.30 (1.38 - 1.30)                                | 65.28 - 1.60 (1.69 - 1.60)                                              | 58.6 - 1.85 (1.96 - 1.85)                                                                                                                               |
| Unique refelction            | 97204 (5986)                                  | 134505 (20892)                                            | 133165 (9641)                                            | 148328 (23194)                                            | 98121 (15492)                                                           | 70266 (11256)                                                                                                                                           |
| Multiplicity                 | 9.78 (7.69)                                   | 12.01 (6.96)                                              | 5.78 (5.45)                                              | 3.77 (3.31)                                               | 6.12 (6.05)                                                             | 6.8 (6.81)                                                                                                                                              |
| Completeness (%)             | 97.9 (82.4)                                   | 99.3 (96.3)                                               | 99.1 (98.1)                                              | 98.5 (96.5)                                               | 99.5 (98.0)                                                             | 98.0 (99.1)                                                                                                                                             |
| I/s                          | 36.29 (3.3)                                   | 23.82 (3.40)                                              | 18.90 (2.38)                                             | 14.07 (1.31)                                              | 15.08 (1.73)                                                            | 12.61 (1.2)                                                                                                                                             |
| Rmeas (%)                    | 3.4 (62.5)                                    | 5.8 (59.7)                                                | 4.4 (84.4)                                               | 5.5 (115.5)                                               | 7.2 (92.0)                                                              | 10.0 (141.3)                                                                                                                                            |
| CC(1/2) (%)                  | 100.0 (82.2)                                  | 99.9 (86.1)                                               | 99.9(73.9)                                               | 99.9 (45.0)                                               | 99.9 (73.4)                                                             | 99.9 (35.6)                                                                                                                                             |
| Wilson B (Å <sup>2</sup> )   | 20.1                                          | 17.7                                                      | 17.25                                                    | 15.71                                                     | 22.02                                                                   | 38.48                                                                                                                                                   |
| <b>Refinement Statistics</b> |                                               |                                                           |                                                          |                                                           |                                                                         |                                                                                                                                                         |
| Resolution                   | 34.43 - 1.50 (1.54 - 1.50)                    | 77.95 - 1.35 (1.38 - 1.35)                                | 49.47 - 1.35 (1.38 - 1.35)                               | 45.74 - 1.30 (1.33 - 1.30)                                | 45.09 - 1.60 (1.64 - 1.60)                                              | 48.94 - 1.85 (1.89 - 1.85)                                                                                                                              |
| R <sub>work</sub> (%)        | 15.76 (19.16)                                 | 14.72 (26.33)                                             | 13.86 (19.83)                                            | 14.51 (26.56)                                             | 15.34 (28.65)                                                           | 19.65 (34.89)                                                                                                                                           |
| R <sub>free</sub> (%)        | 17.54 (22.46)                                 | 16.12 (27.30)                                             | 16.30 (24.11)                                            | 16.98 (27.37)                                             | 17.16 (30.16)                                                           | 22.34 (35.17)                                                                                                                                           |
| Number of non-hydrogen atoms |                                               |                                                           |                                                          |                                                           |                                                                         |                                                                                                                                                         |
| Protein                      | 4618                                          | 4595                                                      | 4599                                                     | 4521                                                      | 4493                                                                    | 4463                                                                                                                                                    |
| Ligand/ion                   | 37                                            | 286                                                       | 95                                                       | 142                                                       | 105                                                                     | 61                                                                                                                                                      |
| Water                        | 576                                           | 576                                                       | 633                                                      | 687                                                       | 661                                                                     | 416                                                                                                                                                     |
| B-factors (Å <sup>2</sup> )  |                                               |                                                           |                                                          |                                                           |                                                                         |                                                                                                                                                         |
| Protein                      | 25.94                                         | 25.09                                                     | 23.48                                                    | 22.03                                                     | 26.8                                                                    | 39.3                                                                                                                                                    |
| Ligand/ion                   | 25.66                                         | 22.27                                                     | 22.24                                                    | 25.07                                                     | 44.12                                                                   | 60.99                                                                                                                                                   |
| Water                        | 36.75                                         | 36.62                                                     | 33.34                                                    | 35.83                                                     | 36.3                                                                    | 42.74                                                                                                                                                   |
| Ramachandran favored (%)     | 96.79                                         | 96.08                                                     | 97.33                                                    | 96.79                                                     | 97.72                                                                   | 98.07                                                                                                                                                   |
| allowed (%)                  | 3.21                                          | 3.74                                                      | 2.67                                                     | 3.21                                                      | 2.28                                                                    | 1.93                                                                                                                                                    |
| outliers (%)                 | 0                                             | 0.18                                                      | 0                                                        | 0                                                         | 0                                                                       | 0                                                                                                                                                       |
| R.m.s. deviations            |                                               |                                                           |                                                          |                                                           |                                                                         |                                                                                                                                                         |
| Bond lenght (Å)              | 0.004                                         | 0.004                                                     | 0.01                                                     | 0.006                                                     | 0.011                                                                   | 0.012                                                                                                                                                   |
| Bond angles (°)              | 0.761                                         | 0.844                                                     | 1.115                                                    | 0.851                                                     | 1.116                                                                   | 1.185                                                                                                                                                   |
| Molprobit score              | 1.22                                          | 1.18                                                      | 1.04                                                     | 1.18                                                      | 0.94                                                                    | 0.96                                                                                                                                                    |
