# Supplementary material for: Clostridium perfringens chitinases, key enzymes during early stages of necrotic enteritis in broiler chickens
Source: PubMed Central journal article supplement (PMC11426533; doi:10.1371/journal.ppat.1012560), 2024-09-16
Supplement: ppat.1012560.s004.pdf [file ppat.1012560.s004.pdf]

**S4 Table: GH18 domain containing proteins in *netB*-negative *C. perfringens* strains.**

The NCBI whole genome sequencing assembly database containing 778 complete genomes of *C. perfringens* (minimum scaffold or contig level; downloaded on 13/08/2024) was searched for GH18 (PFAM accession PF00704) or GH19 (PFAM accession PF00182) domain containing proteins using HMMER v3.3.2 (E-value cut-off = 1e-05). 85.7% (48/56) of the *C. perfringens* strains harbouring GH18, also contained NetB. The table represents the 8 strains that harbour a GH18 family member, but where no NetB was found. Overall sequence similarity between the identified GH18 domain containing proteins and ChiA or ChiB was calculated using protein-protein BLAST (NCBI).

| Strain            | GenBank accession No. | Host                                   | Location  | Protein ID     | BLASTp ChiA   |          | BLASTp ChiB   |          |
|-------------------|-----------------------|----------------------------------------|-----------|----------------|---------------|----------|---------------|----------|
|                   |                       |                                        |           |                | Query cover   | Identity | Query cover   | Identity |
| <b>G5</b>         | GCF_032250115.1       | Goat                                   | China     | WP_012748796.1 | 47.00%        | 20.60%   | 40.00%        | 26.59%   |
| <b>x94</b>        | GCF_034420755.1       | manure treated soil from research farm | Canada    | WP_322395987.1 | 19.00%        | 25.62%   | 24.00%        | 23.19%   |
| <b>JIR246</b>     | GCF_951336965.1       | Porcine                                | Belgium   | WP_163243987.1 | no similarity |          | no similarity |          |
| <b>CW500</b>      | GCF_951337405.1       | Porcine                                | unknown   | WP_033860799.1 | 16.00%        | 25.66%   | no similarity |          |
| <b>CperBRD5</b>   | GCF_951336235.1       | Chicken                                | Australia | WP_283676337.1 | 43.00%        | 29.04%   | 43.00%        | 98.85%   |
| <b>CperB2H112</b> | GCF_951336145.1       | Chicken                                | Australia | WP_283697426.1 | 73.00%        | 29.03%   | 99.00%        | 95.83%   |
|                   |                       |                                        |           | WP_283697427.1 | 99.00%        | 96.07%   | 71.00%        | 29.75%   |
| <b>Cper103980</b> | GCF_951336185.1       | Chicken                                | Australia | WP_283697426.1 | 73.00%        | 29.03%   | 99.00%        | 95.83%   |
|                   |                       |                                        |           | WP_283697427.1 | 99.00%        | 96.07%   | 71.00%        | 29.75%   |
| <b>CperB1H119</b> | GCF_951336835.1       | Chicken                                | Australia | WP_283697426.1 | 73.00%        | 29.03%   | 99.00%        | 95.83%   |
|                   |                       |                                        |           | WP_283697427.1 | 99.00%        | 96.07%   | 71.00%        | 29.75%   |
