# Supplementary material for: Clostridium perfringens chitinases, key enzymes during early stages of necrotic enteritis in broiler chickens
Source: PubMed Central journal article supplement (PMC11426533; doi:10.1371/journal.ppat.1012560), 2024-09-16
Supplement: ppat.1012560.s005.pdf [file ppat.1012560.s005.pdf]

**S5 Table: Presence of *chiA* and *chiB* in collection of *C. perfringens* strains using PCR screening.**

A diverse collection of *C. perfringens* strains, obtained from different hosts, was screened using PCR to assess the prevalence of *chiA* and *chiB*. The fragments were PCR amplified using the BioMix DNA polymerase according to the manufacturers' instructions (Bioline, London, UK). The primers that were used to amplify the *chiA* or *chiB* gene are ChiA\_fw (5'-GTTTCTTGAGAGGAATAATAAATGACAAAAGCTAAAGAAAATTTAAAACA-3') + ChiA\_rev (5'-GTTTCTTGGTTTATCATTACCAATTGGATTCATTCCATT-3') and ChiB\_fw (5'-GTTTCTTGAGAGGAATAATAAATGAATACAATCTCTGTTAAGGCTATGAGT-3') + ChiB\_rev (5'-GTTTCTTGGTGAATTTGTATTTTCCAAATTGTTTGTCTATT-3'), respectively. The PCR reaction procedure consisted of: initial denaturation 3 min at 95°C, 35 amplification cycles (30 s at 95°C, 30 s at 50°C and 90 s at 72°C) and final elongation 12 min at 72°C.

| Strain                       | Host    | Disease state | <i>netB</i> | <i>chiA</i> | <i>chiB</i> | Location  | Reference                                                  |
|------------------------------|---------|---------------|-------------|-------------|-------------|-----------|------------------------------------------------------------|
| CP1                          | Broiler | Healthy       | -           | -           | -           | Belgium   | doi: 10.1016/j.vetmic.2005.10.023.                         |
| CP2                          | Broiler | Healthy       | -           | -           | -           | Belgium   | doi: 10.1016/j.vetmic.2005.10.023.                         |
| CP3                          | Broiler | Healthy       | -           | -           | -           | Belgium   | doi: 10.1016/j.vetmic.2005.10.023.                         |
| CP4                          | Broiler | Healthy       | -           | -           | -           | Belgium   | doi: 10.1016/j.vetmic.2005.10.023.                         |
| CP5                          | Broiler | Healthy       | -           | -           | -           | Belgium   | doi: 10.1016/j.vetmic.2005.10.023.                         |
| CP6                          | Broiler | Healthy       | -           | -           | -           | Belgium   | doi: 10.1016/j.vetmic.2005.10.023.                         |
| CP7                          | Broiler | Healthy       | -           | -           | -           | Belgium   | doi: 10.1016/j.vetmic.2005.10.023.                         |
| CP8                          | Broiler | Healthy       | -           | -           | -           | Belgium   | doi: 10.1016/j.vetmic.2005.10.023.                         |
| CP9                          | Broiler | Healthy       | -           | -           | -           | Belgium   | doi: 10.1016/j.vetmic.2005.10.023.                         |
| CP10                         | Broiler | Healthy       | -           | -           | -           | Belgium   | doi: 10.1016/j.vetmic.2005.10.023.                         |
| CP11                         | Broiler | Healthy       | -           | -           | -           | Belgium   | doi: 10.1016/j.vetmic.2005.10.023.                         |
| CP12                         | Broiler | Healthy       | -           | -           | -           | Belgium   | doi: 10.1016/j.vetmic.2005.10.023.                         |
| CP13                         | Broiler | Healthy       | -           | -           | -           | Belgium   | doi: 10.1016/j.vetmic.2005.10.023.                         |
| CP15                         | Broiler | Healthy       | -           | -           | -           | Belgium   | doi: 10.1016/j.vetmic.2005.10.023.                         |
| CP17                         | Broiler | Healthy       | -           | -           | -           | Belgium   | doi: 10.1016/j.vetmic.2005.10.023.                         |
| CP18                         | Broiler | Healthy       | -           | -           | -           | Belgium   | doi: 10.1016/j.vetmic.2005.10.023.                         |
| CP20                         | Broiler | Healthy       | -           | -           | -           | Belgium   | doi: 10.1016/j.vetmic.2005.10.023.                         |
| CP21                         | Broiler | Healthy       | -           | -           | -           | Belgium   | doi: 10.1016/j.vetmic.2005.10.023.                         |
| CP22                         | Broiler | Healthy       | -           | -           | -           | Belgium   | doi: 10.1016/j.vetmic.2005.10.023.                         |
| CP23                         | Broiler | Healthy       | +           | +           | +           | Belgium   | doi: 10.1016/j.vetmic.2005.10.023.                         |
| CP24                         | Broiler | Healthy       | -           | -           | -           | Belgium   | doi: 10.1016/j.vetmic.2005.10.023.                         |
| CP25                         | Broiler | Healthy       | -           | -           | -           | Belgium   | doi: 10.1016/j.vetmic.2005.10.023.                         |
| CP27                         | Broiler | Healthy       | -           | -           | -           | Belgium   | doi: 10.1016/j.vetmic.2005.10.023.                         |
| CP28                         | Broiler | NE            | +           | +           | +           | Belgium   | doi: 10.1016/j.vetmic.2005.10.023.                         |
| CP37                         | Broiler | NE            | +           | +           | +           | Belgium   | doi: 10.1016/j.vetmic.2005.10.023.                         |
| CP38                         | Broiler | NE            | +           | +           | +           | Belgium   | doi: 10.1016/j.vetmic.2005.10.023.                         |
| CP43                         | Broiler | NE            | -           | -           | -           | Belgium   | doi: 10.1016/j.vetmic.2005.10.023.                         |
| CP56 (JIR12037)              | Broiler | NE            | +           | +           | +           | Belgium   | doi: 10.1016/j.vetmic.2005.10.023.                         |
| CP58                         | Broiler | NE            | +           | +           | +           | Belgium   | doi: 10.1016/j.vetmic.2005.10.023.                         |
| CP60                         | Broiler | NE            | +           | +           | +           | Belgium   | doi: 10.1016/j.vetmic.2005.10.023.                         |
| CP61                         | Broiler | NE            | +           | +           | +           | Belgium   | doi: 10.1016/j.vetmic.2005.10.023.                         |
| 97.78718-2 (D2)              | Broiler | NE            | +           | +           | +           | Denmark   | Pedersen K., pers. Com.; doi.org/10.3389/fcimb.2021.645248 |
| 99.63206-34 (JIR12033) (D3)  | Broiler | NE            | +           | +           | +           | Denmark   | doi: 10.1051/vetres/2009069                                |
| 00.82196-2 (D4)              | Broiler | NE            | -           | -           | -           | Denmark   | Pedersen K., pers. Com.; doi.org/10.3389/fcimb.2021.645248 |
| 30100-1-B1 (D5)              | Broiler | NE            | +           | +           | +           | Denmark   | Pedersen K., pers. com.                                    |
| 200302-1-1-Ba (D6)           | Broiler | NE            | +           | +           | +           | Denmark   | doi: 10.1051/vetres/2009069                                |
| 75-659481-1 (D7)             | Broiler | NE            | +           | +           | +           | Denmark   | Pedersen K., pers. com.                                    |
| 70292-4 (D8)                 | Broiler | NE            | +           | +           | +           | Denmark   | Pedersen K., pers. Com.; doi.org/10.3389/fcimb.2021.645248 |
| 75.65603-1 (D9)              | Broiler | NE            | -           | -           | -           | Denmark   | Pedersen K., pers. com.                                    |
| 75.65603-2 (JIR 12036) (D10) | Broiler | NE            | -           | -           | -           | Denmark   | Pedersen K., pers. com.                                    |
| 75.65948-1 (D11)             | Broiler | NE            | +           | +           | +           | Denmark   | doi: 10.1051/vetres/2009069                                |
| 75.65948-6 (D12)             | Broiler | NE            | +           | +           | +           | Denmark   | Pedersen K., pers. com.                                    |
| 97.71994-2 (D13)             | Broiler | NE            | +           | +           | +           | Denmark   | Pedersen K., pers. Com.; doi.org/10.3389/fcimb.2021.645248 |
| 98.73920-13 (D14)            | Broiler | NE            | -           | -           | -           | Denmark   | Pedersen K., pers. com.                                    |
| 00.71842-1 (D15)             | Broiler | NE            | +           | +           | +           | Denmark   | Pedersen K., pers. Com.; doi.org/10.3389/fcimb.2021.645248 |
| EHE-NE1 (JIR4857)            | Broiler | NE            | -           | -           | -           | Australia | doi: 10.1186/s13567-020-00825-6                            |
| EHE-NE5 (JIR4860)            | Broiler | NE            | +           | +           | +           | Australia | doi: 10.1128/JCM.42.3.1345-1347.2003                       |
| EHE-NE15 (JIR4866)           | Broiler | NE            | +           | +           | +           | Australia | doi: 10.1128/JCM.42.3.1345-1347.2003                       |

|                     |              |                                   |   |   |   |             |                                                          |
|---------------------|--------------|-----------------------------------|---|---|---|-------------|----------------------------------------------------------|
| EHE-NE18 (JIR4869)  | Broiler      | NE                                | + | + | + | Australia   | doi: 10.1128/JCM.42.3.1345-1347.2003                     |
| EHE-NE20 (JIR4870)  | Broiler      | NE                                | + | + | + | Australia   | doi: 10.1128/IAI.00806-06                                |
| NAG-NE23 (JIR4873)  | Broiler      | NE                                | - | - | - | Australia   | doi: 10.1128/JCM.42.3.1345-1347.2003                     |
| NAG-NE24 (JIR4874)  | Broiler      | NE                                | - | - | - | Australia   | doi: 10.1128/JCM.42.3.1345-1347.2003                     |
| UNK-NE30 (JIR12058) | Broiler      | NE                                | + | + | + | Australia   | doi: 10.1051/vetres/2009069                              |
| EHE-NE32 (JIR12071) | Broiler      | NE                                | - | - | - | Australia   | doi: 10.1051/vetres/2009069                              |
| JGS4096             | Broiler      | NE                                | - | - | - | USA         | G. Songer, pers. com.                                    |
| JGS4100             | Broiler      | NE                                | + | + | + | USA         | G. Songer, pers. com.; doi.org/10.3389/fcimb.2021.645248 |
| JGS4102             | Broiler      | NE                                | + | + | + | USA         | G. Songer, pers. com.                                    |
| JGS4104             | Broiler      | NE                                | - | - | - | USA         | G. Songer, pers. com.                                    |
| JGS4120             | Broiler      | NE                                | - | - | - | USA         | G. Songer, pers. com.                                    |
| JGS4121             | Broiler      | NE                                | - | - | - | USA         | G. Songer, pers. com.; doi.org/10.3389/fcimb.2021.645248 |
| JGS4122             | Broiler      | NE                                | - | - | - | USA         | G. Songer, pers. com.                                    |
| JGS4123             | Broiler      | NE                                | + | + | + | USA         | G. Songer, pers. com.                                    |
| JGS4125             | Broiler      | NE                                | - | - | - | USA         | G. Songer, pers. com.                                    |
| JGS4126             | Broiler      | NE                                | - | - | - | USA         | G. Songer, pers. com.                                    |
| PK805               | Broiler      | NE                                | - | - | - | Belgium     | this study                                               |
| PL687               | Broiler      | NE                                | - | - | - | Belgium     | this study                                               |
| PK22                | Broiler      | NE                                | - | - | - | Belgium     | this study                                               |
| PM69                | Broiler      | NE                                | + | + | + | Belgium     | this study                                               |
| PM100               | Broiler      | NE                                | - | - | - | Belgium     | this study                                               |
| PK403               | Broiler      | NE                                | - | - | - | Belgium     | this study                                               |
| PK406               | Broiler      | NE                                | - | - | - | Belgium     | this study                                               |
| PK407               | Broiler      | NE                                | - | - | - | Belgium     | this study                                               |
| PJ660               | Broiler      | NE                                | - | - | - | Belgium     | this study                                               |
| S2                  | Broiler      | NE                                | - | - | - | Denmark     | L. Abildgaard, pers. com.                                |
| S13                 | Broiler      | NE                                | + | + | + | Denmark     | L. Abildgaard, pers. com.                                |
| S27                 | Broiler      | NE                                | - | - | - | Denmark     | L. Abildgaard, pers. com.                                |
| S36                 | Broiler      | NE                                | + | + | + | Denmark     | L. Abildgaard, pers. com.                                |
| T2                  | Broiler      | NE                                | - | - | - | Denmark     | L. Abildgaard, pers. com.                                |
| T19                 | Broiler      | NE                                | + | + | + | Denmark     | L. Abildgaard, pers. com.                                |
| CP72                | Layer pullet | NE                                | - | - | - | Belgium     | doi.org/10.1080/03079457.2020.1772460                    |
| CP97                | Layer pullet | NE                                | - | - | - | Belgium     | this study                                               |
| CP117               | Layer pullet | NE                                | - | - | - | Belgium     | this study                                               |
| CP148               | Layer pullet | NE                                | - | - | - | Belgium     | this study                                               |
| CP199               | Layer pullet | Healthy                           | - | - | - | Belgium     | this study                                               |
| CP200               | Layer pullet | Healthy                           | - | - | - | Belgium     | this study                                               |
| CP203               | Layer pullet | Healthy                           | - | - | - | Belgium     | this study                                               |
| BCP62               | Bovine       | Bovine enterotoxaemia             | - | - | - | Belgium     | doi: 10.1016/j.jcpa.2012.11.237                          |
| BCP20               | Bovine       | Healthy calf (abomasal ulcer)     | - | - | - | Belgium     | doi: 10.1016/j.jcpa.2010.02.004                          |
| MLP8                | Sheep        | /                                 | - | - | - | Switzerland | H. Posthaus, pers. com.                                  |
| MLP144              | Deer         | /                                 | - | - | - | Switzerland | H. Posthaus, pers. com.                                  |
| JF3721              | Pig          | Piglet with necrotizing enteritis | - | - | - | Switzerland | doi: 10.1128/IAI.01284-09                                |
| JIR325              | Human        | Gas gangrene                      | - | - | - | Australia   | doi: 10.1086/514022                                      |
| 7442                | Bovine       | Bovine enterotoxaemia             | - | - | - | Belgium     | this study                                               |
| BCP513              | Bovine       | Healthy calf                      | - | - | - | Belgium     | doi: 10.1186/1746-6148-10-32                             |
| BCP447              | Bovine       | Healthy calf                      | - | - | - | Belgium     | doi: 10.1016/j.jcpa.2012.11.237                          |
| BCP730              | Bovine       | Bovine enterotoxaemia             | - | - | - | Belgium     | doi: 10.1186/1746-6148-10-32                             |
| BCP740              | Bovine       | Healthy calf                      | - | - | - | Belgium     | doi: 10.1186/1746-6148-10-32                             |
| BCP747              | Bovine       | Healthy calf                      | - | - | - | Belgium     | doi: 10.1186/1746-6148-10-32                             |
| BCP783              | Bovine       | Ruminating cattle                 | - | - | - | Belgium     | doi: 10.1186/1746-6148-10-32                             |
| BCP815              | Bovine       | Ruminating cattle                 | - | - | - | Belgium     | doi: 10.1186/1746-6148-10-32                             |
| BCP820              | Bovine       | Ruminating cattle                 | - | - | - | Belgium     | doi: 10.1186/1746-6148-10-32                             |
| BCP256              | Bovine       | Bovine enterotoxaemia             | - | - | - | Belgium     | doi: 10.1016/j.jcpa.2012.11.237                          |
| BCP311              | Bovine       | Healthy calf                      | - | - | - | Belgium     | doi: 10.1186/1746-6148-10-32                             |
| BCP588              | Bovine       | Bovine enterotoxaemia             | - | - | - | Belgium     | doi: 10.1186/1746-6148-10-32                             |
| BCP334              | Bovine       | Healthy calf                      | - | - | - | Belgium     | doi: 10.1016/j.jcpa.2012.11.237                          |
| BCP506              | Bovine       | Healthy calf                      | - | - | - | Belgium     | doi: 10.1016/j.jcpa.2012.11.237                          |
| BCP510              | Bovine       | Bovine enterotoxaemia             | - | - | - | Belgium     | doi: 10.1016/j.jcpa.2012.11.237                          |
| MLP98               | Sheep        | Healthy                           | - | - | - | Switzerland | H. Posthaus, pers. com.                                  |
| DCP1.1              | Dog          | Healthy                           | - | - | - | Belgium     | This study                                               |
| DCP1.2              | Dog          | Healthy                           | - | - | - | Belgium     | This study                                               |
| ECP1                | Horse        | Healthy                           | - | - | - | Belgium     | This study                                               |
| ECP2                | Horse        | Healthy                           | - | - | - | Belgium     | This study                                               |
| ECP3                | Horse        | Healthy                           | - | - | - | Belgium     | This study                                               |
| ECP4                | Horse        | Healthy                           | - | - | - | Belgium     | This study                                               |
| ECP5                | Horse        | Healthy                           | - | - | - | Belgium     | This study                                               |
| SCP1                | Sheep        | Healthy                           | - | - | - | Belgium     | doi: 10.1186/1746-6148-10-32                             |
| SCP2                | Sheep        | Healthy                           | - | - | - | Belgium     | doi: 10.1186/1746-6148-10-32                             |
| SCP3                | Sheep        | Healthy                           | - | - | - | Belgium     | doi: 10.1186/1746-6148-10-32                             |
| SCP4                | Sheep        | Healthy                           | - | - | - | Belgium     | doi: 10.1186/1746-6148-10-32                             |
| SCP5                | Sheep        | Healthy                           | - | - | - | Belgium     | doi: 10.1186/1746-6148-10-32                             |
| GCP1                | Goat         | Healthy                           | - | - | - | Belgium     | This study                                               |
| GCP2                | Goat         | Healthy                           | - | - | - | Belgium     | This study                                               |
| GCP3                | Goat         | Healthy                           | - | - | - | Belgium     | This study                                               |
