# Supplementary material for: Clostridium perfringens chitinases, key enzymes during early stages of necrotic enteritis in broiler chickens
Source: PubMed Central journal article supplement (PMC11426533; doi:10.1371/journal.ppat.1012560), 2024-09-16
Supplement: ppat.1012560.s006.pdf [file ppat.1012560.s006.pdf]

**S6 Table: Variants detected in CP56 chitinase mutants.**

| Strain(s)          | Variant Type     | Variant (DNA) | Variant (Protein) | OrfID          | Gene   | Gene product                                                 | Comments                              |
|--------------------|------------------|---------------|-------------------|----------------|--------|--------------------------------------------------------------|---------------------------------------|
| CP56Δ <i>chiA1</i> | missense_variant | c.380G>T      | p.Arg127Ile       | FHMOEFBK_00914 | adhE_3 | Aldehyde-alcohol dehydrogenase                               |                                       |
|                    | missense_variant | c.1546G>T     | p.Ala516Ser       | FHMOEFBK_01293 | ykoD   | Putative HMP/thiamine import ATP-binding protein YkoD        | 6% of reads correct variant detected  |
|                    | missense_variant | c.226G>T      | p.Ala76Ser        | FHMOEFBK_01743 | grpE_1 | Protein GrpE                                                 |                                       |
|                    | missense_variant | c.451G>T      | p.Ala151Ser       | FHMOEFBK_02364 | mccF   | Microcin C7 self-immunity protein MccF                       |                                       |
|                    | missense_variant | c.99G>T       | p.Lys33Asn        | FHMOEFBK_03168 |        | Hypothetical protein                                         |                                       |
| CP56Δ <i>chiA2</i> | missense_variant | c.836C>T      | p.Thr279Ile       | FHMOEFBK_01691 | topB_2 | DNA topoisomerase 3                                          |                                       |
|                    | missense_variant | c.458C>A      | p.Ser153Tyr       | FHMOEFBK_01878 |        | hypothetical protein                                         |                                       |
|                    | missense_variant | c.179G>T      | p.Gly60Val        | FHMOEFBK_02207 | csh    | Carbon disulfide hydrolase                                   |                                       |
|                    | missense_variant | c.355C>A      | p.Gln119Lys       | FHMOEFBK_02477 |        | hypothetical protein                                         |                                       |
|                    | stop_gained      | c.1090G>T     | p.Glu364*         | FHMOEFBK_02990 |        | hypothetical protein                                         | total length: 1137, but shorter       |
|                    | missense_variant | c.703G>T      | p.Asp235Tyr       | FHMOEFBK_03023 |        | Arylsulfatase                                                |                                       |
|                    | missense_variant | c.998C>A      | p.Ala333Glu       | FHMOEFBK_03131 | brnQ_3 | Branched-chain amino acid transport system 2 carrier protein |                                       |
| CP56Δ <i>chiB1</i> | missense_variant | c.525C>A      | p.Ser175Arg       | FHMOEFBK_00530 | glpF_1 | Glycerol uptake facilitator protein                          |                                       |
|                    | missense_variant | c.830G>T      | p.Arg277Ile       | FHMOEFBK_01764 |        | Cobalt-dependent inorganic pyrophosphatase                   |                                       |
| CP56Δ <i>chiB2</i> | missense_variant | c.1852G>T     | p.Asp618Tyr       | FHMOEFBK_00810 |        | hypothetical protein                                         |                                       |
|                    | missense_variant | c.1616G>T     | p.Arg539Ile       | FHMOEFBK_00922 |        | hypothetical protein                                         |                                       |
|                    | missense_variant | c.599C>A      | p.Ala200Glu       | FHMOEFBK_01347 | ntpA   | V-type sodium ATPase catalytic subunit A                     | 31% of reads correct variant detected |
|                    | missense_variant | c.117G>T      | p.Met39Ile        | FHMOEFBK_01431 | rpmF   | 50S ribosomal protein L32                                    |                                       |
|                    | missense_variant | c.706G>A      | p.Asp236Asn       | FHMOEFBK_01947 |        | hypothetical protein                                         |                                       |
|                    | missense_variant | c.457G>T      | p.Ala153Ser       | FHMOEFBK_01949 |        | hypothetical protein                                         | 39% of reads correct variant detected |
|                    | missense_variant | c.895G>T      | p.Val299Leu       | FHMOEFBK_02166 |        | hypothetical protein                                         |                                       |
|                    | missense_variant | c.3159G>T     | p.Lys1053Asn      | FHMOEFBK_02803 | rpoC   | DNA-directed RNA polymerase subunit beta                     |                                       |
