# Supplementary material for: Clostridium perfringens chitinases, key enzymes during early stages of necrotic enteritis in broiler chickens
Source: PubMed Central journal article supplement (PMC11426533; doi:10.1371/journal.ppat.1012560), 2024-09-16
Supplement: ppat.1012560.s007.pdf [file ppat.1012560.s007.pdf]

**S7 Table: Variants detected in CP56 chitinase mutants and BLASTp results with predicted impacts.**

| Strain(s)          | OrfID          | Genbank accession | % identity | Description                                          | Extra info                                                                           |
|--------------------|----------------|-------------------|------------|------------------------------------------------------|--------------------------------------------------------------------------------------|
| CP56Δ <i>chiA1</i> | FHMOEFBK_00914 | WP_110083220.1    | 100        | Iron-containing alcohol dehydrogenase                | Catalyses oxidation of ethanol to acetaldehyde                                       |
|                    | FHMOEFBK_01293 | WP_003456102.1    | 100        | ABC transporter ATP-binding protein                  | Regulating the import and export of substances across plasma membranes               |
|                    | FHMOEFBK_01743 | WP_003455172.1    | 100        | Nucleotide exchange factor GrpE                      | Regulation of protein folding, heat shock                                            |
|                    | FHMOEFBK_02364 | WP_078209983.1    | 100        | S66 peptidase family protein                         | LD-carboxypeptidases, bacterial antibiotic resistance                                |
|                    | FHMOEFBK_03168 | WP_003450903.1    | 100        | DUF1667 domain-containing protein                    | Potential metal-binding proteins                                                     |
| CP56Δ <i>chiA2</i> | FHMOEFBK_01691 | EGT5618054.1      | 99,86      | Type IA DNA topoisomerase                            | Function in transcription and DNA replication                                        |
|                    | FHMOEFBK_01878 | ELC8349289.1      | 97,78      | Zn-dependent exopeptidase M28                        | Bacterial leucyl aminopeptidases, release N-terminal AA residues from polypeptides   |
|                    | FHMOEFBK_02207 | WP_011009793.1    | 100        | Carbonic anhydrase                                   | pH regulation                                                                        |
|                    | FHMOEFBK_02477 | WP_003456782.1    | 100        | Peptidylprolyl isomerase                             | Interconverts the cis and trans isomers of peptide bonds with the amino acid proline |
|                    | FHMOEFBK_02990 | WP_004458069.1    | 100        | Mechanosensitive ion channel family protein          | Osmotic balance                                                                      |
|                    | FHMOEFBK_03023 | WP_110083405.1    | 100        | Arylsulfatase                                        | Cleavage sulphate-containing fats                                                    |
|                    | FHMOEFBK_03131 | WP_003458178.1    | 100        | Branched-chain amino acid transport system 2 carrier | Diffusion of sugars, amino acids, and nucleosides across membrane                    |
| CP56Δ <i>chiB1</i> | FHMOEFBK_00530 | WP_004457307.1    | 100        | MIP/aquaporin family protein                         | Aqueous pores, passive transport of their solute(s) across the membrane              |
|                    | FHMOEFBK_01764 | WP_004457849.1    | 100        | Putative manganese-dependent inorganic diphosphatase | Controls biosynthetic reactions that produce Ppi, RNA synthesis                      |
| CP56Δ <i>chiB2</i> | FHMOEFBK_00810 | VTQ57712.1        | 99,8       | CoA-substrate-specific enzyme activase               | Provide a reactive electron that their cognate enzyme requires for activity          |
|                    | FHMOEFBK_00922 | WP_110083215.1    | 100        | DUF4091 domain-containing protein                    | Domain with uncharacterised function, often conserved in N-acetylgalactosaminidases  |
|                    | FHMOEFBK_01347 | WP_003449648.1    | 100        | V-type ATP synthase subunit A                        | Produces ATP from ADP in the presence of a proton gradient across the membrane       |
|                    | FHMOEFBK_01431 | WP_003449428.1    | 100        | 50S ribosomal protein L32                            | Binds/regulates splicing and translation of transcript                               |
|                    | FHMOEFBK_01947 | WP_224391477.1    | 100        | Alpha/beta fold hydrolase                            | Catalyze bond cleavages by reaction with water, break down nutrients for digestion   |
|                    | FHMOEFBK_01949 | WP_078209964.1    | 100        | IS110 family transposase                             | Binding/catalysation transposon to DNA                                               |
|                    | FHMOEFBK_02166 | WP_057230598.1    | 100        | GH25 family lysozyme                                 | Hydrolyzing glycosidic bonds in peptidoglycans, function debatable                   |
|                    | FHMOEFBK_02803 | WP_224361666.1    | 99,92      | DNA-directed RNA polymerase subunit beta'            | RNA synthesis                                                                        |
