# Supplementary material for: Clostridium perfringens chitinases, key enzymes during early stages of necrotic enteritis in broiler chickens
Source: PubMed Central journal article supplement (PMC11426533; doi:10.1371/journal.ppat.1012560), 2024-09-16

S1 Fig: Overview of DNA sequence of chitinases ChiA and ChiB with annotated features and primers

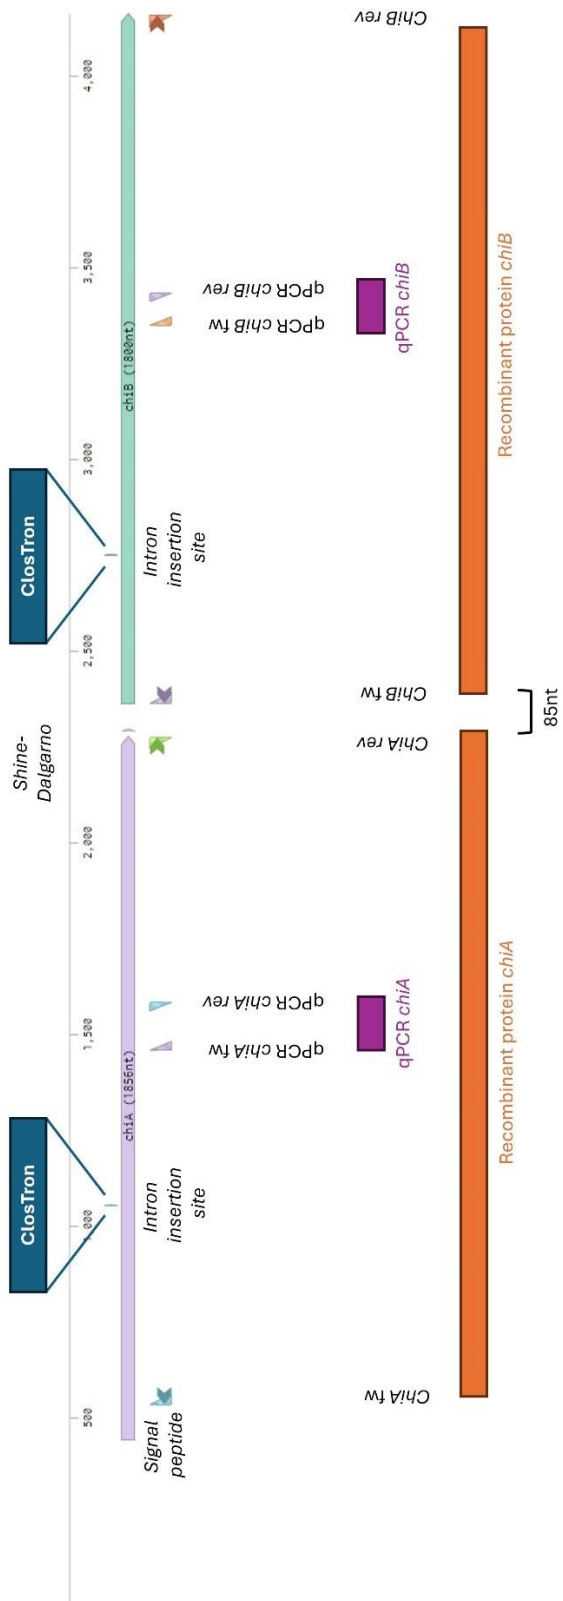

Supplement: ppat.1012560.s008.pdf [file ppat.1012560.s008.pdf]
