# Supplementary material for: Clostridium perfringens chitinases, key enzymes during early stages of necrotic enteritis in broiler chickens
Source: PubMed Central journal article supplement (PMC11426533; doi:10.1371/journal.ppat.1012560), 2024-09-16
Supplement: ppat.1012560.s010.pdf [file ppat.1012560.s010.pdf]

**S3 Fig: Structure based alignments of *C. perfringens* ChiA and ChiB with related chitinases.** Top) Structure based sequence alignment of *C. perfringens* ChiA with *C. violaceum* chitinase (pdb 4tqx) and *C. perfringens* ChiB with *S. marcescens* ChiA (pdb 7fd6). Bottom) Cartoon representation of the aligned structures. Alignments were performed with GTalign (Margelevicius, M. GTalign: High-performance protein structure alignment, superposition, and search. bioRxiv 2023.12.18.572167; (2023). doi: <https://doi.org/10.1101/2023.12.18.572167>) with options -s0 --pre-score=0.1 --depth=0. In grey, parts of the proteins rejected from the alignment.
