# Supplementary material for: Clostridium perfringens chitinases, key enzymes during early stages of necrotic enteritis in broiler chickens
Source: PubMed Central journal article supplement (PMC11426533; doi:10.1371/journal.ppat.1012560), 2024-09-16

## S5 Fig: Growth analysis mutant strains in different culture media

Nutrient rich medium: Brain heart infusion broth

Nutrient poor medium: 50% tryptic soy broth, 25% nutrient broth and 25% peptone water

Overnight cultures were 1/1000 diluted in different media. The optical density at 600nm was measured semi-continuously.

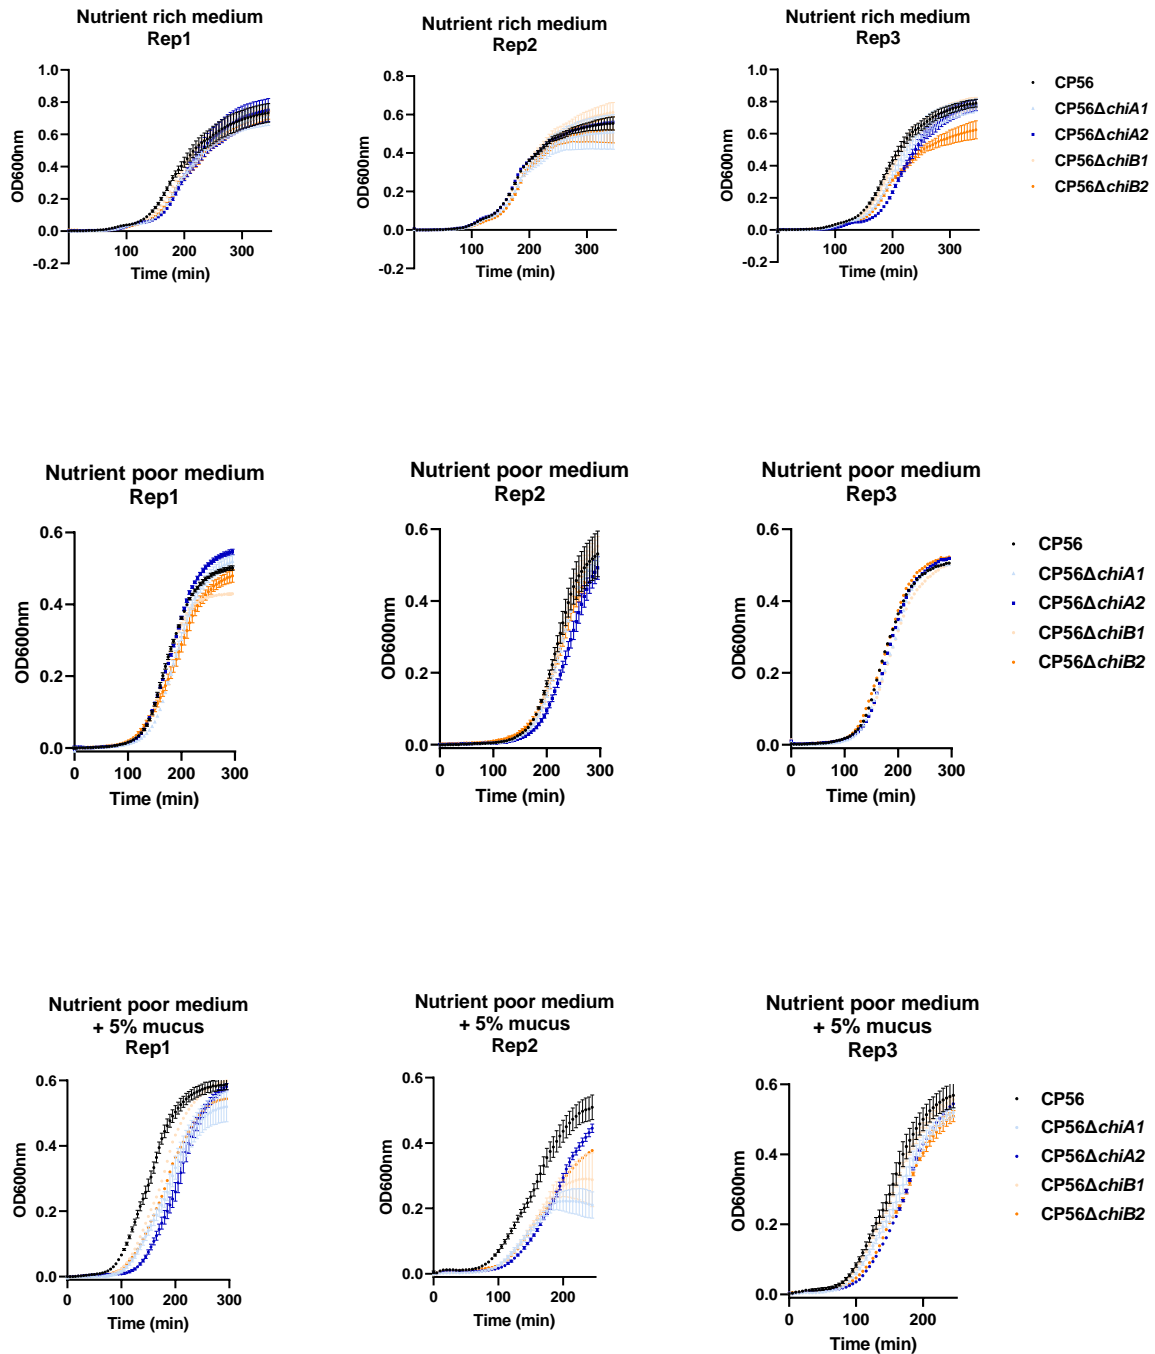

Supplement: ppat.1012560.s012.pdf [file ppat.1012560.s012.pdf]
