# Supplementary material for: Clostridium perfringens chitinases, key enzymes during early stages of necrotic enteritis in broiler chickens
Source: PubMed Central journal article supplement (PMC11426533; doi:10.1371/journal.ppat.1012560), 2024-09-16
Supplement: ppat.1012560.s014.pdf [file ppat.1012560.s014.pdf]

## S1 Data: Nucleotide and protein sequence of chitinases ChiA and ChiB

DNA sequence *chiA* (GenBank accession number F8UN15)

atgaaaaattcaaaattaaacaaatcctaataacatttctacaattacattaacttcaagctatcttgaacatcatcaaactcctatagaaca  
aaagctaaagaaaaatttaaaacaacaaaaattaaaaattcatctgaacttaatagaagctagtcggatattttccagaatgggcatattcta  
gtgaagcacaaggatattttaatgtaacagattacaatgggattcattaacacatatacaaatctcttggctatggtagatccatctacaata  
aaattactttaagtaataacatgctgcaattgaagaagattttcggaattgatttaactacaacgggaagaaaatagaattagatccttctt  
taccttataaaggacacttcaacgttttacaactatgaaaaaaattatccagatgtatcattattaatttctgttgagggtggacaggaaca  
gatgtttctacactatgattgacactgataatagaataaacatttgcagattcatgtgtgattttatcagaaaataggattgat**ggagtaga**  
**cattgatttgaat**atccttcatcccaagccaatcaggaatccagacgattttgatctttcagaaccaagaaggacaaaacttaacgaaagat  
ataatatttaataaaaactttaagagaaaaatagatatggcatctaaagaagatggaaaagaatatttataacagctgctgttactgcttctc  
cttgggttttaggcggaatatcggataatacttatgcaaagtagatttcttaagcataatgtcatatgactaccacggtgggttgaatgaata  
tgtagaacacttagctggtatttcttaataaggaagatagagaaacagtaactcaataatgccaactttatgtatggattggcctacagat  
attacagagggttttgcctgctgaaaaatattaatgggtatcccttattacacaagagggtgggaaaatgttcaagggtggaattaatggacttc  
atggatcaagtaaaactccagcatcaggcaaatataatatttgggagacgatttaataatgatggagttttagaacgggctggtgcaaatcct  
ttatggcatgtattaatcttatggaacaagatccaaattaaagtatattgggatgaaatttctaaagtacatatttggcaaaacgataaa  
aaagtattcgtatcattgaaaatgaaaaatctatagatgcaagattagaatatacaaaaataaaaatcttgggtggcgttaatttgggtaatg  
aacggagattacggataaatccgaattatgtagaaggttcaataagataaatgaaggtaaatatactttggagatacattaacgaaaagat  
taagccaagggttaaaaaagatgggagtttgaataaaacaccagatgactaaatatactttagagcctattaatgtagatgttaaatttaag  
gaaagtatgatcatccaattacacatattcaattgatatacaaaattatacagacaaggaataaagggtggatggaatgtttcatttgattac  
caaagtctgctgtatttaatcatcatggggaggccacatatagttacagacaatgggtgactttaatacaataacattaactcaggagcttggc  
aaaatatagcgcctaactcaacaataacagttcaaggtatgattggattatgcttctctggaataagaaatgtcactttcaatggaatgaatcca  
attggtaatgataaata

⇒ Target region Clostron mutagenesis in bold

⇒ Proton donor region underlined

Protein sequence ChiA

MKNSKLNKQILITFLTITLSSYLVTSSNPIETKAKKFKTTKIKNSSELNRKLVGYFPEWAYSSEAQGYFNVTDLQWDSL  
THIQYSFAMVDPSTNKITLSNKHAAIEEDFSEFDLNYNGKKIELDPSLPYKGFHFNVLQTMKKNYPDVSLLISVGGWT  
GTRCFYTMIDTDNRINTFADSCVDFIRKYGFDGVDIDFEYPSSTSQSGNPDDFDLSEPRRTKLNERYNILIKTLREKID  
MASKEDGKEYLLTAAVTASPWVLGGISDNTYAKYLDFLSIMSYDYHGGWNEYVEHLAGIYPNKEDIETVTQIMPTL  
CMDWAYRYRGLVPAEKILMGIPYYTRGWENVQGGINGLHGSSKTPASGKYNILGDDLNDGVLEPAGANPLW  
HVLNLMEQDPNLKVYWDEISKVPYVWQNDKKVFSFENEKSIDARLEYIQNKNLGGALIWVMNGDYGLNPNYVE  
GSNKINEGKYTFGDTLTKRLSQGLKMGVCNKTPDDLNISLEPINVDVKFNGKYDHPNNTYSIDITNYTDKEIKGGW  
NVSFDLPKSAVFKSSWGGTYSVTDNGDFNTITLTSQAWQNIAPNSTITVQGMIGLCFSGIRNVTFNGMNPIGNDK

⇒ Domains:

|        |                                  |
|--------|----------------------------------|
| Blue   | Predicted signal peptide         |
| Orange | Glycosyl hydrolase 18 domain     |
| Green  | Carbohydrate binding domain ChiC |

⇒ Active site DIDFE (underlined)

= Substitution of E196 to Q reduces the activity of the enzyme.

DNA sequence *chiB* (GenBank accession number F8UNI4)

gtgaatacaatctctgtaaggctatgagtaaactttctgatacaactgaaattacttctcaatctactactaagttacgaaatgtaatgtattatg  
gtgattggctatttgggggtggacaaggtaactttatcctaagatattccagcagataaattaacgcacttaaatttgcattcatggatttcaa  
ctcatctggtgaattaatttattgcgataaagatgctgcaataggacatccattaggaatttgggagtaacctatggagatgtaatggtggaat  
attaaatgcttttcaagttttaaactgaaaatcctaattaaagataggagtatcttaggtggatggtcaaagtctggcgatttttcaacaata  
gccgcaactccttcaataagagctaaattttagaaaacgttatgaaattcattaataataccaatatggactttgtgatattgattgggaatat  
**cctggagattacagagaacctgataaaactgacaataaataatgatgaaggaacaccaaagcaagtgcaggagataaagaaaattatattctt**  
attattacaagatttaaaggaggctttaaataaacaaggaaaagaattaggaaaagttagagctatccgtggcattgccagctggcgtatca  
aaaatagaaaaaggaatagacgttgacaagttatataatagtagattttgctaataataatgacatatgatattggctggagcttggagtacaac  
aagtggacatcaaactgccttatacactaacctaatgctcctgaagaataaagggactttctgtagatgaaagtgttaaataattatcaca  
agggtcagaaaagagaaaaatagttgtaggagcagcatattatcccgtaggaggggaacaagtttcagataaaggtacagatccaaataatcc  
aggattatttggagaagcagctgtagttaataaagatgcagacctttccaacgccaggagcacttaatgaggctccaatgaaaaatggtgaa  
ggaggaagagctggtggtgatgggatataatgctttagataaataaaatcctaataactggtctaaaagagtattgggatgatagtgctaa  
agctccatattatataattctgaaacaggtgcatttttacttatgataataatagatcaatccaagaaaagctaaatattgtaaagaaaataa  
tcttgggtgataatcggtggatggcttcacaagatgcaactacaactcaactaaaagagatgaattaacaactgcaactaaggaatctttat  
ttgtaagaagatttacctaataatgaaataaaatataactgaaaatgatataactgtacagtaactccagtaaagcaatcatggggaagtgg  
aggagtactaaagatgtcaataacaacaatgagaaattagatgaatctggtgaagtattatcaacagttgaaacatccgcaaaaacagttaa  
aaatgaaagtataattaagactgatggaatagcaattactggttcacaatatccagcaggacctgttcaaaaagaaggagattactatgtaa  
tagatttggtaagatatcagatggaagctaatgaaagcaggaataacctttacttttgattaaatcttgataaagcaattgaagatactaata  
atattataagcattgaagtatctcaagaatgtatcaaacatctcctgaattcaatagacaaacaatttgggaaaatacaaatcatag

⇒ Target region Clostron mutagenesis in bold

⇒ Proton donor region underlined

Protein sequence ChiB

MNTISVKAMSKSSDTEITSQSTTKLRNVMYYGDWSIWGGQGNFYKPKDIPADKLHLNFAFMDFNSSGELIYCDK  
DAAIGHPLGNLGVTYGDVNGGILNAFQVLKSENPNLKIGVSLGGWSKSGDFSTIAATPSIRAKFVENVMKFIKYTN  
MDFVDIDWEYPGDYREPKTDNINDEGTPNASAGDKENYILLQLKEALNKQKELGKVYELSVALPAGVSKIEK  
GIDVDKLFNIVDFANIMTYDMAGAWSTTSGHQALYTNPNAPPEYKGLSVDESVKYIISQGAEREKIVVGAAYYTR  
GWEQVSDKGTDPNNPGLFGEAAVVNKDADLSPTPGALNEAPMKNNGEGGRAGGVWGYNALDKLKSXYTGLKEY  
WDDSAKAPYLYNSETGAFFTYDNIRSIQEKAKYVKENNLGGIIGWMASQDATTNSTKRDELTTATKESLFGKEDLPK  
YEIKYTENDITCTVTPVKQSWGSGGVLKMSITNNEKLDESSEVLSTVETSAKTVKNMKVYIKTDGIAITGSQYPAGP  
VTKEGDYVIDFGKISDGKLMKAGITFFDLNLDKAIEDTNNIISIEVSQRMYQTSPEFNRQTIWENTNS

⇒ Domains:

Orange Glycosyl hydrolase 18 domain

Green Carbohydrate binding domain

⇒ Active site DIDWE (underlined)

= Substitution of E160 to D reduces the activity of the enzyme.
